# Supplementary material for: Pigmented Microbial Extract (PMB) from Exiguobacterium Species MB2 Strain (PMB1) and Bacillus subtilis Strain MB1 (PMB2) Inhibited Breast Cancer Cells Growth In Vivo and In Vitro
Source: MDPI journal article supplement (doi:10.3390/ijms242417412), 2023-12-12
Supplement: s1 [file s1]

## Supplementary information

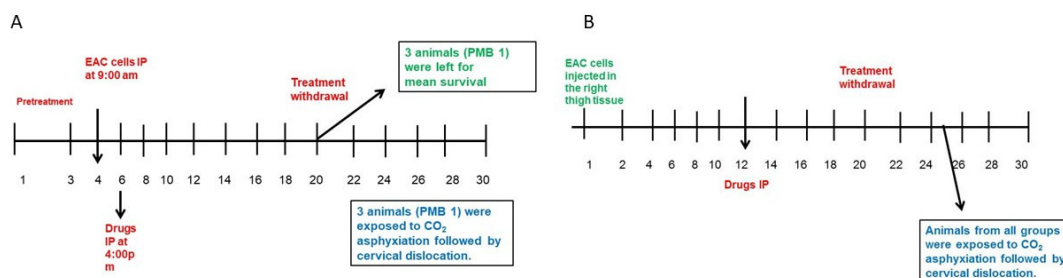

**Figure S1A.** Study design of EAC liquid tumor model in Swiss albino mice. **S1B:** Study design of EAC solid tumor model in Swiss albino mice.

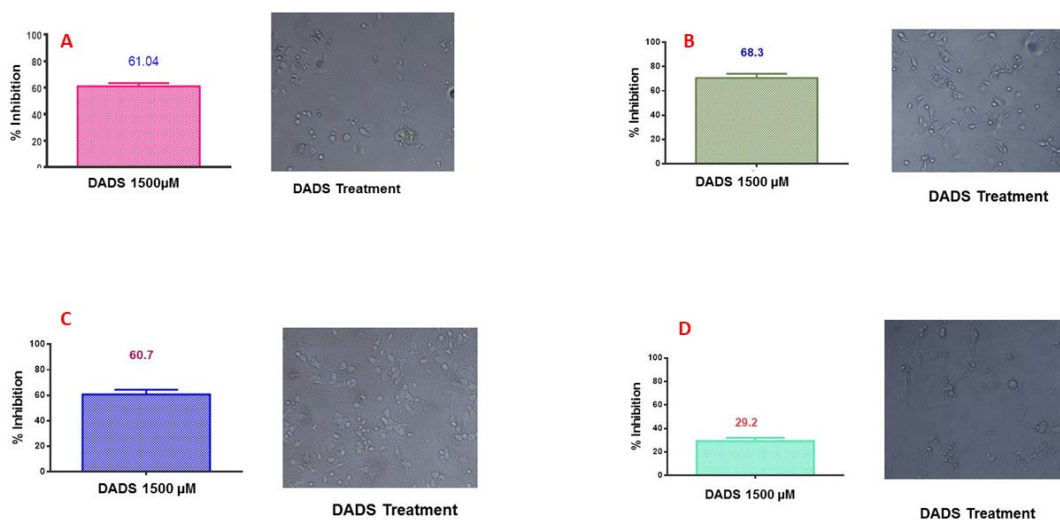

**Figure S2.** DADS (1500µM) decreased the viability of MDA-MB-468 (S2A), MDA-MB-231 (S2B), and MCF-7 (S2C) cells. DADS has also reduced the viability of normal cell line BEAS-2B (S2D).

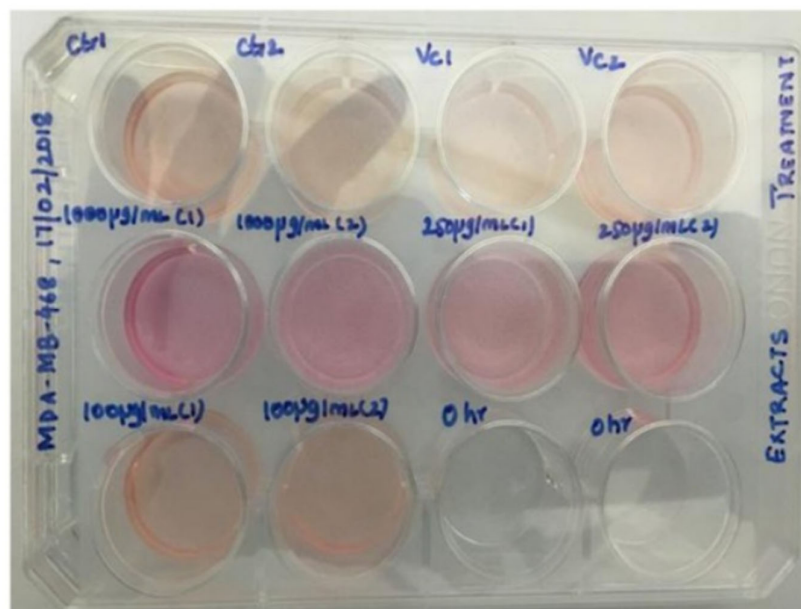

**Figure S3. Cytostatic effect of the microbial extract on MDA MB-468 cell growth.** MDA-MB-468 cells were treated with the increasing concentration of the microbial extract (100 µg/ml, 250 µg/ml and 1000µg/ml) for 48 hours in six well plates. The media color in the treatment group showed less consumption of nutrients as evidenced by pink color compared to control /VC wherein the medium is pale yellow in color.

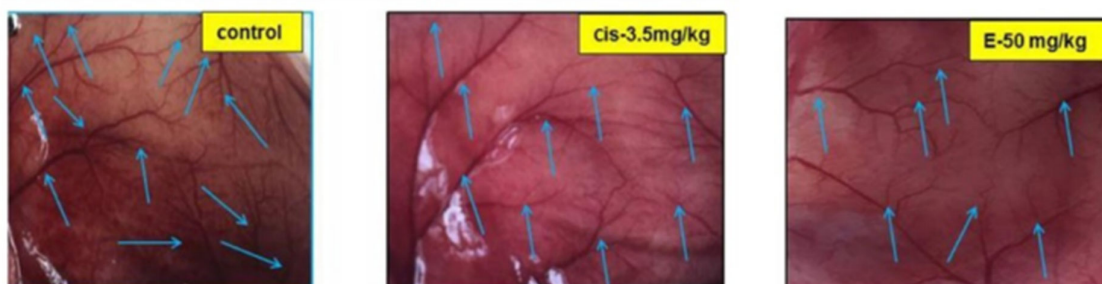

**Figure S4. PMB1 reduced angiogenesis in mice.** The effect of microbial extract on angiogenesis was examined in the peritoneum of EAC-xenografted mice. PMB1 inhibited the formation of blood vessels at the concentration of 50 mg/kg body weight.

**List of Supplementary Tables:****Table S1.** EAC liquid tumor model study groups. Number of mice in each group = 5.

| Group                       | Treatment                 |
|-----------------------------|---------------------------|
| Normal                      | Untreated                 |
| Control                     | EAC                       |
| Standard (Positive Control) | EAC + Cisplatin 3.5 mg/kg |
| PMB1(High Dose)             | EAC + PMB1 100mg/kg       |
| PMB1(Low Dose)              | EAC + PMB1 50mg/kg        |

**Table S2.** EAC solid tumor model study groups. Number of mice in each group = 5.

| Group                       | Treatment                 |
|-----------------------------|---------------------------|
| Normal                      | Untreated                 |
| Control                     | EAC                       |
| Standard (Positive Control) | EAC + Cisplatin 3.5 mg/kg |
| PMB1(High Dose)             | EAC + PMB1 50mg/kg        |
| PMB1(Low Dose)              | EAC + PMB1 25mg/kg        |

**Table S3.** IC-50 values of microbial extracts PMB1 and PMB2 against BC cell lines and normal lung epithelial cell line BEAS-2B.

| IC-50 values of pharmacological agents tested |            |            |       |         |
|-----------------------------------------------|------------|------------|-------|---------|
| Inhibitor                                     | MDA-MB-468 | MDA-MB-231 | MCF-7 | BEAS-2B |
| PMB1( $\mu\text{g/mL}$ )                      | 795        | 939.3      | >2000 | >2000   |
| PMB2( $\mu\text{g/mL}$ )                      | >2000      | >2000      | >2000 | >2000   |

**Table S4.** Average body weight of Swiss albino mice on the day of sacrifice.

| Treatment | Dose          | Average body weight on day 20 |
|-----------|---------------|-------------------------------|
| Normal    | Untreated     | $22.6 \pm 0.48$               |
| Control   | EAC untreated | $45.1 \pm 2.46$               |
| Cisplatin | 3.5 mg/kg     | $33.1 \pm 0.64$               |
| PMB1      | 50 mg/kg      | $28.2 \pm 1.24$               |
